# Supplementary material for: Structures and Spectroscopy Studies of Two M(II)-Phosphonate Coordination Polymers Based on Alkaline Earth Metals (M = Ba, Mg)
Source: Hindawi journal article supplement (doi:10.1155/2013/378379), 2012-11-28
Supplement: f1 [file 378379.f1.doc]

**Supplemental Material**

Structures and spectroscopy studies of two novel M(II)-phosphonate coordination polymers based on alkaline earth metals (M = Ba, Mg)

Kui-Rong Maa,*, Chun-Li Weib, Yu Zhanga, Yu-He Kana, Ming-Hui Conga and Xiao-Jing Yanga

a Jiangsu Key Laboratory for Chemistry of Low-dimensional Materials, School of Chemistry and Chemical Engineering, Huaiyin Normal University, Huaian 223300, PR China

b Department of Criminal Science and Technology, Jilin Police College, Changchun 130117, PR China

* Corresponding author: [kuirongma@163.com](mailto:kuirongma@163.com). Tel: 86-517-83525100. Fax: 86-517-83525100.

**Table S1**. Selected bond lengths (Å) and angles (º) for **1-2**.

| Compound **1**  bond lengths |  |  |  |
| --- | --- | --- | --- |
| Ba(1)-O(1) | 2.634(3) | Ba(2)-O(4) | 2.748(3) |
| Ba(1)-O(4) | 2.728(3) | Ba(2)-O(2) | 2.759(3) |
| Ba(1)-O(8) | 2.790(4) | Ba(2)-O(7) | 2.776(3) |
| Ba(1)-O(12) | 2.832(4) | Ba(2)-O(15) | 2.786(4) |
| Ba(1)-O(7) | 2.836(3) | Ba(2)-O(14) | 2.836(4) |
| Ba(1)-O(10) | 2.863(3) | Ba(2)-O(13) | 2.888(3) |
| Ba(1)-O(11) | 2.866(3) | Ba(2)-O(11)a | 2.903(4) |
| Ba(1)-O(9) | 2.887(4) | Ba(2)-O(9)a | 2.949(3) |
| Ba(2)-O(1) | 3.172(4) |  |  |
| angles |  |  |  |
| O(1)-Ba(1)-O(4) | 75.61(1) | O(4)-Ba(2)-O(2) | 87.79(1) |
| O(1)-Ba(1)-O(8) | 106.97(1) | O(4)-Ba(2)-O(7) | 75.19(9) |
| O(4)-Ba(1)-O(8) | 144.70(1) | O(2)-Ba(2)-O(7) | 116.89(1) |
| O(1)-Ba(1)-O(12) | 75.02(1) | O(4)-Ba(2)-O(15) | 74.76(1) |
| O(4)-Ba(1)-O(12) | 137.92(1) | O(2)-Ba(2)-O(15) | 86.39(1) |
| O(8)-Ba(1)-O(12) | 73.49(1) | O(7)-Ba(2)-O(15) | 140.82(1) |
| O(1)-Ba(1)-O(7) | 75.28(1) | O(4)-Ba(2)-O(14) | 88.96(1) |
| O(4)-Ba(1)-O(7) | 74.55(9) | O(2)-Ba(2)-O(14) | 161.45(1) |
| O(8)-Ba(1)-O(7) | 72.34(1) | O(7)-Ba(2)-O(14) | 79.77(1) |
| O(12)-Ba(1)-O(7) | 124.86(1) | O(15)-Ba(2)-O(14) | 75.13(1) |
| O(1)-Ba(1)-O(10) | 137.64(1) | O(4)-Ba(2)-O(13) | 129.22(1) |
| O(4)-Ba(1)-O(10) | 72.31(1) | O(2)-Ba(2)-O(13) | 74.15(1) |
| O(8)-Ba(1)-O(10) | 85.13(1) | O(7)-Ba(2)-O(13) | 72.06(1) |
| O(12)-Ba(1)-O(10) | 146.04(1) | O(15)-Ba(2)-O(13) | 147.09(1) |
| O(7)-Ba(1)-O(10) | 70.07(9) | O(14)-Ba(2)-O(13) | 121.22(1) |
| O(1)-Ba(1)-O(11) | 98.77(1) | O(4)-Ba(2)-O(11)a | 146.06(1) |
| O(4)-Ba(1)-O(11) | 82.97(1) | O(2)-Ba(2)-O(11)a | 81.59(1) |
| O(8)-Ba(1)-O(11) | 129.68(1) | O(7)-Ba(2)-O(11)a | 138.05(9) |
| O(12)-Ba(1)-O(11) | 72.54(1) | O(15)-Ba(2)-O(11)a | 72.49(1) |
| O(7)-Ba(1)-O(11) | 157.50(1) | O(14)-Ba(2)-O(11)a | 91.07(1) |
| O(10)-Ba(1)-O(11) | 103.92(1) | O(13)-Ba(2)-O(11)a | 78.50(1) |
| O(1)-Ba(1)-O(9) | 151.89(1) | O(4)-Ba(2)-O(9)a | 140.67(1) |
| O(4)-Ba(1)-O(9) | 122.10(1) | O(2)-Ba(2)-O(9)a | 129.45(1) |
| O(8)-Ba(1)-O(9) | 72.01(1) | O(7)-Ba(2)-O(9)a | 76.11(9) |
| O(12)-Ba(1)-O(9) | 77.96(1) | O(15)-Ba(2)-O(9)a | 114.46(1) |
| O(7)-Ba(1)-O(9) | 128.03(1) | O(14)-Ba(2)-O(9)a | 59.79(1) |
| O(10)-Ba(1)-O(9) | 70.38(1) | O(7)-Ba(2)-O(1) | 68.06(9) |
| O(11)-Ba(1)-O(9) | 65.42(1) | O(15)-Ba(2)-O(1) | 120.49(1) |
| O(13)-Ba(2)-O(9)a | 63.82(1) | O(14)-Ba(2)-O(1) | 143.51(1) |
| O(11)a -Ba(2)-O(9)a | 64.19(1) | O(13)-Ba(2)-O(1) | 65.19(9) |
| O(4)-Ba(2)-O(1) | 67.02(9) | O(11)a -Ba(2)-O(1) | 124.34(1) |
| O(2)-Ba(2)-O(1) | 49.59(9) | O(9)a-Ba(2)-O(1) | 124.20(9) |
| Compound **2**  bond lengths |  |  |  |
| Mg(1)-O(15) | 2.032(2) | Mg(2)-O(10)b | 2.0613(2) |
| Mg(1)-O(14) | 2.049(2) | Mg(2)-O(10) | 2.0613(2) |
| Mg(1)-O(17) | 2.0616(2) | Mg(2)-O(11)b | 2.0981(2) |
| Mg(1)-O(16) | 2.0701(2) | Mg(2)-O(11) | 2.0981(2) |
| Mg(1)-O(13) | 2.0794(2) | Mg(2)-O(12)b | 2.0996(2) |
| Mg(1)-O(18) | 2.0805(2) | Mg(2)-O(12) | 2.0996(2) |
| angles |  |  |  |
| O(15)-Mg(1)-O(14) | 92.44(9) | O(12)b-Mg(2)-O(12) | 180.0 |
| O(15)-Mg(1)-O(17) | 95.80(9) | O(10)b-Mg(2)-O(11)b | 87.65(7) |
| O(14)-Mg(1)-O(17) | 170.86(9) | O(10)-Mg(2)-O(11)b | 92.35(7) |
| O(15)-Mg(1)-O(16) | 85.87(8) | O(10)b-Mg(2)-O(11) | 92.35(7) |
| O(14)-Mg(1)-O(16) | 85.97(8) | O(10)-Mg(2)-O(11) | 87.65(7) |
| O(17)-Mg(1)-O(16) | 90.68(8) | O(11)b-Mg(2)-O(11) | 180.00(7) |
| O(15)-Mg(1)-O(13) | 92.69(8) | O(10)b-Mg(2)-O(12)b | 90.64(8) |
| O(14)-Mg(1)-O(13) | 90.95(8) | O(10)-Mg(2)-O(12)b | 89.36(8) |
| O(17)-Mg(1)-O(13) | 92.60(8) | O(11)b-Mg(2)-O(12)b | 86.73(7) |
| O(16)-Mg(1)-O(13) | 176.54(8) | O(11)-Mg(2)-O(12)b | 93.27(7) |
| O(15)-Mg(1)-O(18) | 178.33(8) | O(10)b-Mg(2)-O(12) | 89.36(8) |
| O(14)-Mg(1)-O(18) | 86.94(8) | O(10)-Mg(2)-O(12) | 90.64(8) |
| O(17)-Mg(1)-O(18) | 84.92(7) | O(11)b-Mg(2)-O(12) | 93.27(7) |
| O(16)-Mg(1)-O(18) | 95.63(8) | O(11)-Mg(2)-O(12) | 86.73(7) |
| O(13)-Mg(1)-O(18) | 85.77(7) | O(10)b-Mg(2)-O(10) | 180.00(6) |

Symmetry transformations used to generate equivalent atoms:

a x, y-1, z b -x+1, -y+2, -z

**Table S2**. Hydrogen bond lengths (Å) and angles (º) for **1**-**2**.

| D-H...A | d(D-H) | d(H...A) | d(D...A) | <(DHA) |
| --- | --- | --- | --- | --- |
| Compound **1** |  |  |  |  |
| O(3W)-H(3W1)...O(1W) | 0.89 | 2.12 | 3.006(6) | 174.1 |
| O(2W)-H(2W2)...O(5)c | 0.90 | 1.92 | 2.802(5) | 169.4 |
| O(2W)-H(2W1)...O(15)b | 0.77 | 2.18 | 2.945(6) | 170.8 |
| O(1W)-H(1W2)...O(3W)d | 0.89 | 1.93 | 2.796(6) | 161.8 |
| O(1W)-H(1W1)...O(3) | 1.00 | 1.70 | 2.685(5) | 166.0 |
| O(15)-H(152)...O(10)e | 0.86 | 1.96 | 2.818(5) | 172.3 |
| O(15)-H(151)...O(5) | 0.85 | 1.85 | 2.694(5) | 178.9 |
| O(14)-H(142)...O(2W)a | 0.96 | 1.94 | 2.795(6) | 146.7 |
| O(14)-H(141)...O(5)f | 0.91 | 1.97 | 2.766(5) | 145.8 |
| O(13)-H(132)...N(1) | 0.84 | 1.98 | 2.812(5) | 168.2 |
| O(12)-H(122)...O(3W)f | 0.91 | 1.95 | 2.792(6) | 153.0 |
| O(12)-H(121)...O(13)b | 0.95 | 1.78 | 2.719(5) | 170.8 |
| O(11)-H(112)...O(8)g | 0.92 | 1.88 | 2.779(5) | 165.6 |
| O(11)-H(111)...O(6) | 0.95 | 1.72 | 2.648(5) | 164.2 |
| O(10)-H(102)...N(2) | 0.87 | 1.87 | 2.737(5) | 170.3 |
| O(10)-H(101)...O(6)f | 0.81 | 1.93 | 2.717(5) | 162.7 |
| O(9)-H(92)...O(2)h | 0.85 | 1.87 | 2.721(5) | 173.2 |
| O(8)-H(82)...O(2)h | 0.87 | 1.79 | 2.615(5) | 158.0 |
| O(9)-H(91)...O(14)b | 0.97 | 2.15 | 2.885(5) | 131.4 |
| O(8)-H(81)...O(1W)f | 0.82 | 2.00 | 2.788(5) | 162.9 |
| O(7)-H(72)...O(3)f | 0.95 | 1.76 | 2.698(4) | 167.0 |
| O(7)-H(71)...O(6)f | 0.91 | 1.76 | 2.667(5) | 169.2 |
| Compound **2** |  |  |  |  |
| N(1)-H(1N)...O(4)g | 0.90 | 1.76 | 2.661(2) | 176.8 |
| N(2)-H(2N)...O(3)f | 0.88 | 1.76 | 2.638(2) | 177.5 |
| N(3)-H(3N)...O(9)f | 0.86 | 1.76 | 2.615(2) | 175.7 |
| O(10)-H(102)...O(6)g | 0.93 | 1.81 | 2.733(3) | 174.3 |
| O(10)-H(102)...O(1W) | 0.93 | 2.94 | 3.493(3) | 120.0 |
| O(11)-H(111)...O(5)g | 0.92 | 1.85 | 2.762(2) | 176.1 |
| O(11)-H(112)...O(12)i | 0.88 | 2.25 | 3.121(3) | 170.9 |
| O(12)-H(122)...O(4W)j | 0.88 | 1.77 | 2.640(3) | 171.0 |
| O(13)-H(131)...O(2) | 0.93 | 1.84 | 2.749(2) | 166.4 |
| O(13)-H(132)...O(5W) | 0.89 | 1.91 | 2.772(3) | 163.3 |
| O(14)-H(141)...O(2W) | 0.89 | 1.85 | 2.723(2) | 169.2 |
| O(14)-H(142)...O(4)j | 0.91 | 1.83 | 2.724(2) | 167.4 |
| O(15)-H(151)...O(18)f | 0.88 | 1.79 | 2.668(2) | 170.6 |
| O(15)-H(152)...O(8)d | 0.90 | 1.90 | 2.741(3) | 156.0 |
| O(16)-H(161)...O(5)j | 0.91 | 1.93 | 2.823(2) | 165.1 |
| O(16)-H(162)...O(8)k | 0.91 | 1.75 | 2.655(2) | 170.7 |
| O(17)-H(171)...O(7)k | 0.90 | 1.80 | 2.693(2) | 172.3 |
| O(17)-H(172)...O(3W) | 0.88 | 1.83 | 2.694(3) | 167.7 |
| O(18)-H(181)...O(5W)g | 0.91 | 1.90 | 2.690(2) | 144.3 |
| O(18)-H(182)...O(6W) | 0.91 | 1.73 | 2.633(3) | 170.2 |
| O(2W)-H(2WA)...O(1)m | 0.90 | 1.82 | 2.699(2) | 164.7 |
| O(2W)-H(2WB)...O(1) | 0.90 | 1.82 | 2.693(2) | 162.0 |
| O(3W)-H(3WA)...O(7)d | 0.90 | 1.93 | 2.765(2) | 155.2 |
| O(3W)-H(3WB)...O(6)n | 0.90 | 1.91 | 2.755(3) | 155.8 |
| O(4W)-H(4WA)...O(8)l | 0.89 | 1.92 | 2.763(2) | 157.5 |
| O(5W)-H(5WA)...O(2)f | 0.92 | 1.78 | 2.692(3) | 172.4 |
| O(6W)-H(6WA)...O(1) | 0.93 | 1.85 | 2.776(3) | 177.8 |
| O5W-H5WB...O(3)d | 0.91 | 1.83 | 2.724(2) | 166.7 |
| O(6W)-H(6WB)...O(2W)g | 0.90 | 1.85 | 2.737(3) | 171.4 |

Symmetry transformations used to generate equivalent atoms:

a x, y-1, z b x, y+1, z c -x+1, -y+1, -z d -x+1, -y+1, -z+1 e x+1, y-1, z f x-1, y, z g x+1, y, z h x-1, y+1, z i -x+2, -y+2, -z j x, y, z-1 k -x, -y+2, -z+1 l -x+2, -y+1, -z+1 m -x+1, -y+2, -z+1 n -x, -y+1, -z+1
